# Supplementary material
Source: publisher figshare collection journal article supplement (https://acs.figshare.com/ndownloader/files/5028949)
Supplement: Supplementary file 1 [file 5028949]

63
7-Silanorbornadiene 34, electronic energy = -1451.7268517 a.u.
 C                 -1.35192000    2.11292700   -0.21039300
 C                  0.96386900    2.24690900    0.68683900
 H                  0.69929200    0.98396900   -1.87919000
 H                 -2.32355600    1.92798000   -0.65905000
 H                  2.00178700    2.17985400    0.99627900
 Si                 0.16120500    0.94606100   -0.49446500
 C                  0.06886900   -0.86739700    0.06936600
 C                  1.28177200   -1.55076300    0.28386400
 C                 -1.13731800   -1.56551500    0.26571900
 C                  1.28493700   -2.87631000    0.71478700
 C                 -1.11676900   -2.89235700    0.69993500
 C                  0.08662300   -3.54605800    0.92999000
 H                  2.23400000   -3.37798100    0.87439300
 H                 -2.05840500   -3.41224000    0.84306800
 H                  0.09069400   -4.57739100    1.26396400
 C                  2.58824000   -0.86266000    0.04038100
 C                  3.13571700   -0.84526200   -1.25137700
 C                  3.25578100   -0.23431700    1.10122300
 C                  4.33783700   -0.17328800   -1.46507400
 C                  4.45876200    0.42258200    0.84912300
 C                  5.01304800    0.46637700   -0.42793400
 H                  4.75682100   -0.14837300   -2.46689500
 H                  4.97070100    0.91957400    1.66857700
 C                 -2.46144500   -0.93055400   -0.01257500
 C                 -2.87770500   -0.74171300   -1.33883500
 C                 -3.28237200   -0.52341900    1.04921600
 C                 -4.10481200   -0.12740800   -1.58334400
 C                 -4.49458400    0.10302800    0.76400200
 C                 -4.92392800    0.30926300   -0.54500600
 H                 -4.42536300    0.01973300   -2.61091600
 H                 -5.12010400    0.43828900    1.58671800
 C                  6.32596300    1.16280300   -0.67755800
 H                  7.15724500    0.45633200   -0.59981600
 H                  6.35623000    1.60073200   -1.67664200
 H                  6.49539400    1.95657900    0.05157600
 C                  2.44469400   -1.55267500   -2.38986100
 H                  2.37733700   -2.62637400   -2.19525400
 H                  1.42272000   -1.18852500   -2.52223700
 H                  2.98731400   -1.40404900   -3.32378800
 C                  2.66884100   -0.25303500    2.48959400
 H                  2.68150900   -1.26404400    2.90595000
 H                  3.23201700    0.40012400    3.15767200
 H                  1.62426800    0.07107800    2.47849600
 C                 -2.01062300   -1.16525000   -2.49970700
 H                 -1.20716900   -0.44230100   -2.67806000
 H                 -1.53871400   -2.13259100   -2.31675200
 H                 -2.60153900   -1.22957100   -3.41429900
 C                 -2.86102200   -0.73760500    2.48200500
 H                 -3.48720000   -0.15211500    3.15731100
 H                 -2.95171400   -1.78996100    2.76505000
 H                 -1.81855400   -0.44802300    2.63225300
 C                 -6.25508300    0.95544400   -0.83035500
 H                 -7.03186700    0.19614400   -0.95811000
 H                 -6.55982500    1.60747200   -0.01037300
 H                 -6.21865200    1.54822500   -1.74595500
 C                 -0.62857100    3.36686800   -0.67369600
 H                 -1.08908500    4.09483500   -1.32922900
 C                  0.61838400    3.43844000   -0.19193500
 H                  1.32636500    4.23123800   -0.39648900
 C                 -0.07485500    2.14424400    1.79315800
 H                  0.18933800    2.16096200    2.84364000
 C                 -1.31956400    2.07270200    1.30854900
 H                 -2.22476900    2.01955600    1.90002300
63
7-Germanorbornadiene 23, electronic energy = -3239.2128556 a.u.
 C                  1.41864500   -2.12316700   -0.14027900
 C                 -0.94346300   -2.29678600    0.69794200
 H                 -0.66514800   -0.90509200   -1.98104600
 H                  2.40468300   -1.93169800   -0.55348200
 H                 -1.98861000   -2.25690400    0.98827300
 C                 -0.06825700    1.01497600    0.09062000
 C                 -1.28345700    1.68462800    0.31457400
 C                  1.13739400    1.70943900    0.28097700
 C                 -1.28925800    3.01336700    0.73675400
 C                  1.11492800    3.03990400    0.70518800
 C                 -0.09107800    3.68984600    0.93479000
 H                 -2.23829000    3.51221800    0.90475400
 H                  2.05477200    3.56431300    0.84396000
 H                 -0.09753500    4.72366800    1.26047800
 C                 -2.57853400    0.96993000    0.09075000
 C                 -3.15804700    0.96216400   -1.18745100
 C                 -3.19132000    0.28678500    1.15096100
 C                 -4.34127600    0.25310900   -1.38678700
 C                 -4.37698100   -0.40601300    0.91344000
 C                 -4.96517900   -0.43574100   -0.34898600
 H                 -4.78584900    0.23773700   -2.37764600
 H                 -4.84757600   -0.94254200    1.73250400
 C                  2.45383900    1.05243100    0.01812300
 C                  2.89245600    0.86823300   -1.30063200
 C                  3.23681300    0.60388300    1.09302300
 C                  4.10628400    0.21857500   -1.52631400
 C                  4.43622000   -0.05277800    0.82654300
 C                  4.88839800   -0.25479700   -0.47667900
 H                  4.44538000    0.07601500   -2.54841500
 H                  5.03329900   -0.41789900    1.65768700
 C                 -6.26017900   -1.17067500   -0.58110300
 H                 -7.11320600   -0.50102200   -0.43985000
 H                 -6.31277200   -1.56445300   -1.59736500
 H                 -6.37213800   -2.00223300    0.11628000
 C                 -2.51370000    1.71158700   -2.32630500
 H                 -2.45383100    2.78007600   -2.10397100
 H                 -1.49105100    1.36556400   -2.49981800
 H                 -3.08293100    1.58061100   -3.24688700
 C                 -2.56378300    0.28665600    2.52139200
 H                 -2.56544600    1.29130900    2.95265400
 H                 -3.10377500   -0.37907000    3.19600000
 H                 -1.51960900   -0.03539700    2.47346700
 C                  2.06916000    1.34683000   -2.47236600
 H                  1.23930800    0.66438700   -2.68452500
 H                  1.63466800    2.32942600   -2.27907400
 H                  2.68293100    1.40521600   -3.37200600
 C                  2.78373400    0.81169700    2.51673600
 H                  3.40498700    0.23757900    3.20586500
 H                  2.84858300    1.86587600    2.79924200
 H                  1.74313900    0.50420200    2.64456400
 C                  6.20560900   -0.93903700   -0.73718900
 H                  7.02979700   -0.22240000   -0.68111900
 H                  6.39590900   -1.72002800    0.00098600
 H                  6.22565800   -1.39174800   -1.72956600
 C                  0.71429800   -3.37215300   -0.62761200
 H                  1.19855000   -4.09290700   -1.27418500
 C                 -0.54637600   -3.46415900   -0.18150700
 H                 -1.23191300   -4.26896400   -0.41415300
 C                  0.06831300   -2.16596300    1.81917700
 H                 -0.22077300   -2.18045400    2.86302300
 C                  1.32644500   -2.07248400    1.36999300
 H                  2.20949500   -1.99289500    1.99170100
 Ge                -0.14220600   -0.87356900   -0.51796800
62
7-Phosphanorbornadiene 25, electronic energy = -1502.96235 a.u.
 C                  1.33335100    1.98665200   -0.12305900
 C                 -0.97394100    2.03065200   -0.76974000
 H                  2.31755000    1.80984400    0.30077600
 H                 -2.04117700    1.88712800   -0.90435000
 C                 -0.04854600   -0.75662000   -0.05488500
 C                 -1.27108600   -1.43159500   -0.24791200
 C                  1.15029400   -1.47786200   -0.22039400
 C                 -1.28237400   -2.75980400   -0.67282600
 C                  1.11109300   -2.80964100   -0.63824000
 C                 -0.09568000   -3.45048500   -0.87814400
 H                 -2.23850900   -3.25111400   -0.82211300
 H                  2.04809000   -3.34313200   -0.75934800
 H                 -0.11196300   -4.48519400   -1.20016300
 C                 -2.58950000   -0.77619800    0.02288600
 C                 -3.05217700   -0.65822900    1.34369900
 C                 -3.37756500   -0.32029600   -1.04329200
 C                 -4.28253800   -0.04520700    1.57378500
 C                 -4.60260400    0.28683400   -0.77212600
 C                 -5.06930000    0.43807100    0.53107200
 H                 -4.63721000    0.05393800    2.59575200
 H                 -5.20444600    0.65301100   -1.59913900
 C                  2.48636900   -0.87864900    0.07322000
 C                  2.85947500   -0.62153000    1.40177400
 C                  3.36944200   -0.57960800   -0.97670800
 C                  4.08434700   -0.00396000    1.65309200
 C                  4.57735400    0.05118200   -0.68459900
 C                  4.94899700    0.35655600    0.62318300
 H                  4.36750200    0.20243100    2.68157600
 H                  5.24679700    0.30961900   -1.50048000
 C                 -6.40783700    1.07286200    0.80761500
 H                 -7.17637700    0.30698500    0.94514000
 H                 -6.37740300    1.67689500    1.71624500
 H                 -6.71941100    1.71212600   -0.01974900
 C                 -2.24585000   -1.18621300    2.50367600
 H                 -1.87687000   -2.19438500    2.30185000
 H                 -1.37612200   -0.55043400    2.69315800
 H                 -2.85211900   -1.21172400    3.40993600
 C                 -2.90394000   -0.46690800   -2.46769500
 H                 -3.01487900   -1.49888400   -2.81276900
 H                 -3.48046500    0.17561500   -3.13513500
 H                 -1.84468300   -0.21599500   -2.55987900
 C                  1.96499500   -0.99080200    2.56049100
 H                  1.20001400   -0.22674200    2.73179700
 H                  1.44696600   -1.93432400    2.37911700
 H                  2.55096800   -1.08306100    3.47607600
 C                  3.03830700   -0.93024000   -2.40737800
 H                  3.63225300   -0.32725900   -3.09675100
 H                  3.26321900   -1.98178400   -2.60871100
 H                  1.98029500   -0.77683700   -2.62443400
 C                  6.27318000    1.01353700    0.91659800
 H                  7.05335100    0.26029400    1.05878100
 H                  6.58282100    1.65948500    0.09339500
 H                  6.22359200    1.61459400    1.82595600
 C                  0.71291500    3.34386500    0.20879600
 H                  1.26503800    4.14191000    0.68641500
 C                 -0.57077000    3.36906700   -0.15148500
 H                 -1.26357900    4.18950200   -0.02352100
 C                 -0.08532200    1.78788500   -1.98351400
 H                 -0.47075900    1.72540600   -2.99286400
 C                  1.19507800    1.76529000   -1.62255100
 H                  2.05160500    1.68177400   -2.27804700
 P                 -0.13473900    0.99124400    0.60063000
72
Silylene 3a, electronic energy = -1602.9402956 a.u.
 C                  0.15902700   -2.31556100    2.14588300
 C                  0.37847800   -1.58066500    0.97818100
 C                 -0.68822600   -0.94632800    0.29607700
 C                 -1.98004900   -1.11324600    0.84696600
 C                 -2.18398600   -1.85817600    2.01342300
 C                 -1.11968100   -2.45672500    2.66890300
 H                  1.00487000   -2.78526900    2.63916700
 H                 -3.19321900   -1.96371100    2.39906900
 H                 -1.28378500   -3.03220800    3.57291300
 C                 -3.20101900   -0.52078600    0.21045700
 C                 -3.71941900   -1.08660300   -0.97107300
 C                 -3.86959100    0.55149900    0.81376900
 C                 -4.85641000   -0.53438200   -1.54700300
 C                 -4.99931600    1.09177200    0.19231700
 C                 -5.50235600    0.57039900   -0.99075800
 H                 -5.25064400   -0.97387400   -2.45944300
 H                 -5.50032400    1.93622500    0.65874000
 C                  1.80132400   -1.53280800    0.50500600
 C                  2.25843400   -2.49165900   -0.41804200
 C                  2.70276600   -0.61392800    1.05396700
 C                  3.59698200   -2.48471900   -0.80117200
 C                  4.03619600   -0.62430400    0.63271400
 C                  4.50093600   -1.54844300   -0.29535900
 H                  3.94595200   -3.22821100   -1.51285300
 H                  4.72767000    0.09874600    1.05965900
 Si                -0.48804800    0.07861600   -1.37968500
 H                  0.52737600   -0.82949000   -2.03279100
 C                  1.68565600    3.19053800    0.25811600
 C                  2.63641800    2.72186400   -0.59226400
 N                  0.59696800    2.33918700    0.13377800
 N                  2.10013200    1.59252100   -1.19967200
 C                  0.85022400    1.34324400   -0.74856500
 C                  1.69656600    4.33613400    1.20954100
 H                  0.94356100    5.08524900    0.95094100
 H                  1.49963700    3.99832200    2.23111100
 H                  2.67056500    4.82378700    1.19750700
 C                 -0.64545500    2.45673600    0.87482500
 H                 -0.85965700    3.50857100    1.06267100
 H                 -1.45148900    2.02359900    0.27660000
 H                 -0.57979900    1.92270500    1.82506600
 C                  4.01566700    3.20816300   -0.87553000
 H                  4.76451800    2.46620000   -0.58301000
 H                  4.15306000    3.42690100   -1.93736000
 H                  4.21071600    4.12287500   -0.31697100
 C                  2.79276600    0.77865500   -2.18627500
 H                  2.47329200    1.05064400   -3.19450400
 H                  3.86544900    0.93197300   -2.08321200
 H                  2.56158700   -0.26797500   -2.00065900
 C                  1.31177700   -3.52686000   -0.96637500
 H                  0.91270400   -4.14985600   -0.16143100
 H                  0.45878700   -3.04820900   -1.45388200
 H                  1.81476700   -4.17066700   -1.68880500
 C                  5.93324900   -1.53334100   -0.76487300
 H                  6.34346500   -2.54428100   -0.81079400
 H                  6.01075800   -1.10526200   -1.76923000
 H                  6.56168500   -0.94011100   -0.09845900
 C                  2.27591200    0.35344000    2.12989700
 H                  2.43681500   -0.08682300    3.11908300
 H                  2.85475500    1.27846100    2.07454500
 H                  1.21479100    0.58943200    2.05433600
 C                 -3.44161800    1.14103300    2.13864400
 H                 -3.46078900    2.23375300    2.09835800
 H                 -4.13217100    0.83428100    2.93007900
 H                 -2.44589400    0.81629500    2.43429900
 C                 -3.05999800   -2.27785700   -1.61867400
 H                 -2.18805400   -1.96605200   -2.20426500
 H                 -2.71444100   -2.99876800   -0.87502700
 H                 -3.75452400   -2.77632000   -2.29659000
 C                 -6.71544800    1.16221500   -1.66107100
 H                 -6.45420700    1.58132200   -2.63622300
 H                 -7.48195000    0.40086700   -1.82526900
 H                 -7.15170400    1.95850000   -1.05643100
72
Germylene 24, electronic energy = -3390.4432397 a.u.
 C                  0.16497400   -2.34028200    2.23914300
 C                  0.37667700   -1.61265700    1.06431500
 C                 -0.69285800   -0.97406600    0.39549200
 C                 -1.97713400   -1.12132300    0.96553300
 C                 -2.17440200   -1.85721900    2.13843900
 C                 -1.10725000   -2.46578500    2.78088500
 H                  1.01270000   -2.81601700    2.72352200
 H                 -3.17923400   -1.94876500    2.53919200
 H                 -1.26426100   -3.03565900    3.68966300
 C                 -3.19598000   -0.51183400    0.34213300
 C                 -3.74422700   -1.07991500   -0.82355800
 C                 -3.82399600    0.58896800    0.93703100
 C                 -4.87623100   -0.50791000   -1.39061900
 C                 -4.94978700    1.14802000    0.32564500
 C                 -5.48585600    0.62001000   -0.84041000
 H                 -5.29438100   -0.94954400   -2.29123600
 H                 -5.42094100    2.01342700    0.78443800
 C                  1.79559600   -1.57605500    0.57880900
 C                  2.23903800   -2.53374500   -0.35179000
 C                  2.70889000   -0.67030900    1.13044100
 C                  3.57634600   -2.53847700   -0.73958600
 C                  4.04138700   -0.69409100    0.70703800
 C                  4.49274000   -1.61728200   -0.22852400
 H                  3.91483400   -3.28083600   -1.45749200
 H                  4.74261700    0.01732900    1.13779000
 H                  0.52959600   -0.86585200   -2.04807900
 C                  1.84283600    3.18806900    0.35946400
 C                  2.78658500    2.68729400   -0.48095900
 N                  0.72214100    2.38267400    0.20927500
 N                  2.21013900    1.58824300   -1.10676700
 C                  0.94841100    1.38632200   -0.67516500
 C                  1.88464600    4.32384900    1.32179100
 H                  1.17545100    5.11064200    1.05162100
 H                  1.64579300    3.98758600    2.33476400
 H                  2.88123200    4.76340400    1.33956900
 C                 -0.51629400    2.54246800    0.95208100
 H                 -0.73540500    3.60354600    1.07178700
 H                 -1.32567200    2.06854600    0.39331000
 H                 -0.43517700    2.07447400    1.93540700
 C                  4.18763600    3.11993100   -0.74356200
 H                  4.90157400    2.34273300   -0.45616700
 H                  4.34428800    3.34867700   -1.80058600
 H                  4.41536300    4.01710900   -0.16902300
 C                  2.87861000    0.75645600   -2.09712000
 H                  2.58645800    1.05950400   -3.10444900
 H                  3.95591400    0.85703000   -1.97762700
 H                  2.59392600   -0.28014300   -1.93020900
 C                  1.28094000   -3.55889700   -0.89884200
 H                  0.88171100   -4.18115200   -0.09333700
 H                  0.42988200   -3.07111100   -1.38016100
 H                  1.77469500   -4.20424100   -1.62628700
 C                  5.92400600   -1.61643500   -0.70155700
 H                  6.32642000   -2.63079700   -0.74158800
 H                  6.00242500   -1.19624800   -1.70924100
 H                  6.55870500   -1.02368100   -0.04059300
 C                  2.29286200    0.29861500    2.20923600
 H                  2.43619300   -0.14995800    3.19736500
 H                  2.89051800    1.21232300    2.16375900
 H                  1.23670700    0.55474300    2.12563300
 C                 -3.35026900    1.18471000    2.24318100
 H                 -3.40361700    2.27629700    2.21025900
 H                 -3.98960400    0.85304300    3.06709000
 H                 -2.33165300    0.88675900    2.48649600
 C                 -3.11919900   -2.29235600   -1.46673200
 H                 -2.25000700   -2.00858200   -2.07050400
 H                 -2.77650500   -3.01085100   -0.71962800
 H                 -3.83381700   -2.78448900   -2.12820900
 C                 -6.69320600    1.23403400   -1.50127200
 H                 -6.43000800    1.65550100   -2.47494700
 H                 -7.47172300    0.48537700   -1.66656900
 H                 -7.11440900    2.03320000   -0.88975000
 Ge                -0.52498500    0.10498800   -1.36560400
71
Phosphinidene 26, electronic energy = -1654.2167536 a.u.
 C                  0.04164000   -1.75378400    2.48290900
 C                  0.27486600   -1.17466000    1.23341100
 C                 -0.79891700   -0.60024800    0.49885600
 C                 -2.10391500   -0.74724100    1.03122600
 C                 -2.30593200   -1.35257100    2.27090700
 C                 -1.23808700   -1.83720200    3.01531400
 H                  0.88125300   -2.18103500    3.02236500
 H                 -3.32044400   -1.44342300    2.64604000
 H                 -1.40342300   -2.30147700    3.98022600
 C                 -3.31222900   -0.29171900    0.27560400
 C                 -3.77693200   -1.04342400   -0.81529300
 C                 -4.00980300    0.85604200    0.67853700
 C                 -4.91145000   -0.61454000   -1.50161900
 C                 -5.13440100    1.25919400   -0.03904100
 C                 -5.59659700    0.54112700   -1.13793900
 H                 -5.26934900   -1.20147700   -2.34296000
 H                 -5.66373300    2.15612200    0.27078700
 C                  1.66674500   -1.29300600    0.68748000
 C                  1.91435000   -2.19491500   -0.36972900
 C                  2.74190900   -0.59749300    1.25830600
 C                  3.19989100   -2.29572400   -0.89169100
 C                  4.01446600   -0.70873900    0.68916200
 C                  4.26091400   -1.53532100   -0.39865100
 H                  3.37984100   -2.98881100   -1.70997900
 H                  4.83207500   -0.13523900    1.11901500
 C                  2.36881800    2.57026400    0.13405800
 C                  2.95039400    2.04450600   -0.97478000
 N                  1.10364400    1.99976000    0.22817800
 N                  2.03540200    1.16021800   -1.52912800
 C                  0.89909600    1.11719400   -0.78678800
 C                  2.87457300    3.57261900    1.11342300
 H                  2.34439900    4.52526500    1.02749000
 H                  2.76088200    3.21513800    2.13952300
 H                  3.93302100    3.76261600    0.93791900
 C                  0.05603900    2.40757300    1.14666000
 H                  0.35857800    3.32623400    1.64611100
 H                 -0.85725400    2.56716900    0.56839900
 H                 -0.14413000    1.63185200    1.88824000
 C                  4.31239700    2.22415800   -1.54690200
 H                  4.88834200    1.29636200   -1.46738900
 H                  4.26876800    2.50903900   -2.60109200
 H                  4.84871700    3.00460000   -1.00850400
 C                  2.26911000    0.36878800   -2.72347900
 H                  2.09063600    0.96517700   -3.62095600
 H                  3.29435300   -0.00065400   -2.71693600
 H                  1.57534700   -0.47193000   -2.70309300
 C                  0.82029000   -3.06643600   -0.93015800
 H                  0.19060200   -3.46890200   -0.13371900
 H                  0.17172400   -2.48558000   -1.59188600
 H                  1.24645600   -3.89731500   -1.49441300
 C                  5.63173000   -1.63731600   -1.01891000
 H                  6.00816300   -2.66225200   -0.97388700
 H                  5.61118400   -1.34791000   -2.07418100
 H                  6.34717600   -0.99292000   -0.50505900
 C                  2.58771400    0.24181800    2.50278700
 H                  2.66653300   -0.38283400    3.39783900
 H                  3.37961200    0.99161300    2.55533200
 H                  1.62026400    0.73923600    2.55025600
 C                 -3.57828700    1.64812000    1.88794900
 H                 -3.99495400    2.65611500    1.85784600
 H                 -3.92061700    1.17020800    2.81074700
 H                 -2.49246900    1.71498800    1.95233600
 C                 -3.07248300   -2.30262700   -1.25578400
 H                 -2.18255300   -2.06058600   -1.84451200
 H                 -2.74557800   -2.89752000   -0.40058300
 H                 -3.73192200   -2.91227900   -1.87517500
 C                 -6.79222700    1.01205700   -1.92548200
 H                 -6.47862100    1.64560500   -2.76003300
 H                 -7.34755900    0.16914900   -2.34067300
 H                 -7.47094400    1.59628000   -1.30174900
 P                 -0.61131900    0.21137000   -1.15594000
21
ImMe4, electronic energy = -383.3632017 a.u.
 C                  0.67825000    0.63258700   -0.00000600
 C                 -0.67824900    0.63259500    0.00000200
 C                 -0.00000700   -1.56717300   -0.00006500
 N                 -1.05609300   -0.70877300   -0.00004400
 N                  1.05608300   -0.70878100   -0.00004800
 C                 -2.43474600   -1.15506800    0.00009800
 H                 -2.42202600   -2.24232800   -0.00028700
 H                 -2.95904200   -0.79865200    0.88988500
 H                 -2.95943300   -0.79802100   -0.88919900
 C                 -1.66505200    1.74939900    0.00002200
 H                 -2.30901600    1.71581600   -0.88329000
 H                 -2.30939800    1.71541900    0.88303800
 H                 -1.14862700    2.70933600    0.00035200
 C                  1.66507400    1.74937500    0.00000700
 H                  2.30922100    1.71557400    0.88317600
 H                  2.30923600    1.71558000   -0.88315100
 H                  1.14866800    2.70932300    0.00000000
 C                  2.43473600   -1.15507500   -0.00002800
 H                  2.95925400   -0.79830000   -0.88953600
 H                  2.95919400   -0.79838300    0.88955000
 H                  2.42200400   -2.24233300   -0.00007600
12
Benzene C6H6, electronic energy = -232.198358 a.u.
 C                 -1.39129000    0.03393100    0.00000000
 C                 -0.66619400    1.22193800   -0.00000900
 C                  0.72499300    1.18779700   -0.00000100
 C                  1.39128800   -0.03399200   -0.00000200
 C                  0.66624700   -1.22190900   -0.00000100
 C                 -0.72504400   -1.18776700    0.00000500
 H                 -2.47458800    0.05980300    0.00000600
 H                 -1.18530700    2.17316000    0.00001900
 H                  1.28958300    2.11283300    0.00002000
 H                  2.47458900   -0.05972200    0.00001300
 H                  1.18524100   -2.17319500   -0.00000900
 H                 -1.28951700   -2.11287400    0.00000000
